# Supplementary material for: Tribbles1 is host protective during in vivo mycobacterial infection
Source: eLife journal article supplement (doi:10.7554/elife.95980), 2024-05-29

B

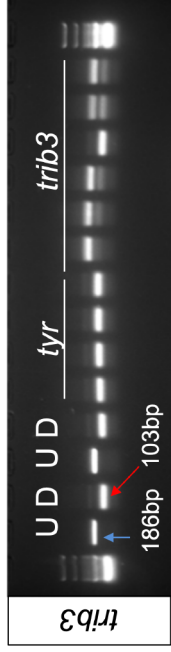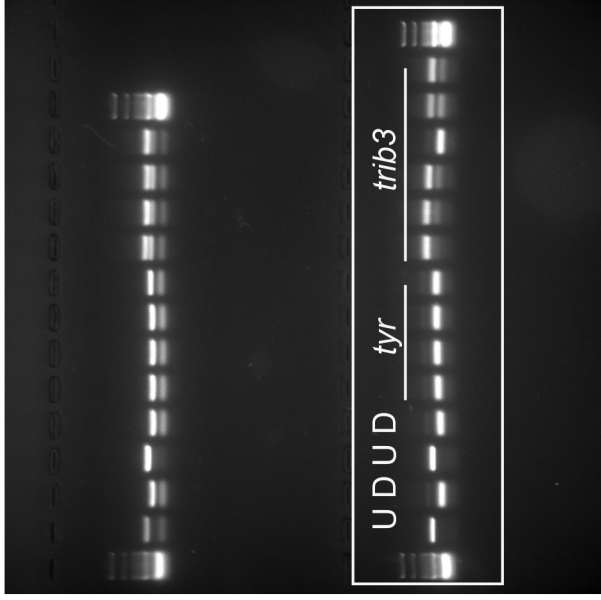

Supplement: fig4-figsupp2-data4 [file elife-95980-fig4-figsupp2-data4-v1.pdf]
