# Supplementary material for: Tribbles1 is host protective during in vivo mycobacterial infection
Source: eLife. 2024 Jun 18;13:e95980. doi: 10.7554/eLife.95980 (PMC11186633; doi:10.7554/eLife.95980)
Supplement: Figure 4—figure supplement 3—source data 3. [file elife-95980-fig4-figsupp3-data3.csv]

trib1+/+	trib1-/-
109	153
88	108
99	114
108	96
81	72
100	65
61	83
113
98	105
72	127
93	108
85	102
101	109
102	115
117	108
103	82
132	111
