# Supplementary material for: Tribbles1 is host protective during in vivo mycobacterial infection
Source: eLife. 2024 Jun 18;13:e95980. doi: 10.7554/eLife.95980 (PMC11186633; doi:10.7554/eLife.95980)
Supplement: Figure 8—figure supplement 1—source data 3. [file elife-95980-fig8-figsupp1-data3.csv]

PR	trib1	tyr	tyr + trib1	cop1	cop1 + trib1
161	137	123	128	162	124
137	101	114	125	129	151
99	99	106	131	103	141
157	115	130	107	148	138
120	119	115	133	107	127
143	152	99	92	129	142
111	102	144	153	133	156
131	131	140	102	92	72
123	153	122	112	128	128
135	145	170	121	115	129
102	99	130	148	108	146
128	128	133	99	141	108
143	142	104	160	135	112
148	119	132	113	152	120
107	166	121	119	124	136
